# Supplementary material for: Genetic disruption of Plasmodium falciparum Merozoite surface antigen 180 (PfMSA180) suggests an essential role during parasite egress from erythrocytes
Source: PubMed Central journal article supplement (PMC8479079; doi:10.1038/s41598-021-98707-0), 2021-09-28

## Supplementary Information

Genetic disruption of *Plasmodium falciparum* Merozoite Surface Antigen 180 (PfMSA180) suggests an essential role during parasite egress from erythrocytes

Vanndita Bahl<sup>1¶\*</sup>, Kritika Chaddha<sup>1¶</sup>, Syed Yusuf Mian<sup>1</sup>, Anthony A. Holder<sup>2</sup>, Ellen Knuepfer<sup>2,3\*</sup>, Deepak Gaur<sup>1</sup>

<sup>1</sup> Laboratory of Malaria and Vaccine Research, School of Biotechnology, Jawaharlal Nehru University, New Delhi, India

<sup>2</sup> Malaria Parasitology Laboratory, The Francis Crick Institute, 1 Midland Road, London, NW1 1AT, United Kingdom

<sup>3</sup> The Royal Veterinary College, Hawkshead Lane, North Mymms, Hatfield, Hertfordshire AL9 7TA, United Kingdom

¶ These authors contributed equally

\*Corresponding authors

Please send correspondence to:

Dr Ellen Knuepfer  
The Royal Veterinary College  
Hawkshead Lane  
Hatfield, AL9 7TA, United Kingdom  
Email: [eknuepfer@rvc.ac.uk](mailto:eknuepfer@rvc.ac.uk)

Miss Vanndita Bahl  
School of Biotechnology  
Jawaharlal Nehru University  
New Delhi India 110067  
E-mail: [vandy.bahl@gmail.com](mailto:vandy.bahl@gmail.com)

## Figure Legends

**Supplementary Figure 1: PfMSA180 is a conserved protein in *Plasmodium* species causing human malaria.** PF3D7- *P. falciparum* 3D7, PmUG01- *P. malariae* UG01, PocGH01- *P. ovale curtisi* GH01, PKNH- *P. knowlesi* strain H, PVP01- *P. vivax* P01. Multiple sequence alignment revealed most conserved residues are in the N-terminal region: residues 1-163, central region: residues 417-731 and C-terminal region: residues 1085-1455. The C-terminal region contains most identical residues (~37%). “\*” identical residues; “:” conserved substitutions; “.” semi-conserved substitutions.

**Supplementary Figure 2: Immobilised Metal Affinity Chromatography (IMAC) purification of PfMSA180 recombinant proteins.** PL- Total lysate, FT- flow through from IMAC column, W1- 10mM imidazole, W2- 20mM imidazole; elution profiles using increasing concentrations of imidazole (50 mM - 500 mM), collected each in 2ml fractions.

(a) Construct 1 (C1) was expressed as soluble protein and was purified from a bacterial pellet supernatant obtained after sonication; (b) Construct 2 (C2), (c) Construct 3 (C3) and (d) Construct 4 (C4) were expressed in inclusion bodies and the protein was purified from these inclusion bodies obtained after sonication.

**Supplementary Figure 3: Measurement of the antibody responses in rabbits against recombinant PfMSA180 proteins.** (a) C1 PfMSA180, (b) C2 PfMSA180, (c) C3 PfMSA180, (d) C4 PfMSA180. Immunogenicity of recombinant PfMSA180 proteins was analyzed by ELISA. The serum samples were serially diluted and end point titers were assessed. Pre-immune sera were used as controls. High titer antibodies were obtained against all recombinant PfMSA180 proteins. The error bars represent the standard error of the mean.

**Supplementary Figure 4: Measurement of the antibody responses in mice against recombinant PfMSA180 proteins.** (a) C1 PfMSA180, (b) C2 PfMSA180, (c) C3 PfMSA180, (d) C4 PfMSA180. Immunogenicity of recombinant PfMSA180 proteins was analyzed by ELISA. The serum samples were serially diluted and end point titers were assessed. Pre-immune sera were used as controls. High titer antibodies were obtained against all recombinant PfMSA180 proteins. The error bars represent the standard error of the mean.

**Supplementary Figure 5: Putative PfSUB1 processing sites in PfMSA180.** The high molecular weight parasite protein MSA180 is predicted to possess potential PfSUB-1 proteolytic cleavage sites<sup>1</sup>. The three potential PfSUB1 cleavage sites are depicted along with the predicted MSA180 processing fragments.

**Supplementary Figure 6: Schematic representation of the generation of inducible *pfmsa180* gene knockout parasites.**

(a) DiCre recombinase-expressing *P. falciparum* parasites II-3 were transfected with pDC2-Cas9-hDHFRyFCU<sup>2</sup> with gRNA (guide RNA) sequence and a repair DNA plasmid carrying two loxPint sequences (SERA2 intron with a 34 bp lox P site)<sup>3</sup> flanking a 94 bp recodonised ORF segment and having 5' homology region of 271 bp and a 3' homology region of 303 bp. The selected gRNA sequence targets Cas9 to a sequence close to the 5' end of the ORF.

(b) Homologous DNA repair utilises the linearised repair plasmid as homology template resulting in the insertion of the two loxPint sequences flanking the 94 bp recodonised ORF sequence. On addition of rapamycin a functional DiCre-recombinase catalyses the recombination between the two loxP sites resulting in the deletion of 197 bp including the recodonised ORF fragment. This excision changes the reading frame resulting in early termination of translation for PfMSA180.

**Supplementary Figure 7: Transgenic *pfmsa180* DNA sequence.**

(a) Part of the DNA sequence of the transgenic *msa180* ORF before excision: The *pfmsa180* ORF with the loxPint (green) and recodonised piece of DNA (Yellow) flanked by two loxPint sites.

(b) Part of the DNA sequence of the transgenic *msa180* ORF after excision: Rapamycin induced excision leads to the removal of one loxPint and the piece of recodonised DNA.

(c) Generation of premature STOP codon after excision: After excision the frame shift in DNA sequence results in the truncation of MSA180 at amino acid 81. Codons are depicted here including the premature stop codon TAG (Red).

**Supplementary Figure 8: Purified PfMSA180 recombinant protein fragments (C1-4).**

(a) Purified recombinant PfMSA180 products (C1-4) separated by SDS-PAGE were stained with coomassie brilliant blue. Ni-NTA elutes were pooled, dialysed and concentrated. M-Protein marker, BC- Before concentration, AC- After concentration. 1-7 correspond to

collected fractions of elutes of the purified antigen. The dashed rectangles represent the area of cropped gel images shown in Figure 1b.

(b) Immunoblots stained with anti- hexa-histidine tag antibody followed by secondary alkaline phosphatase-conjugated secondary antibody. The dashed rectangles represent the area of cropped immunoblot images shown in Figure 1b.

**Supplementary Figure 9: Expression of PfMSA180 in wild-type but not conditional MSA180 knockout parasites.**

Full size immunoblots showing a high molecular weight antigen and its processed protein fragments in wild type parasites (WT), whilst bands are absent in the inducible knockout (iKO) parasites (after rapamycin treatment). Immunoblots were probed with MSA180-specific antibodies raised against recombinant MSA180 (a) Construct 1, (b) Construct 2, (c) Construct 3 and (d) Construct 4. (e) Immunoblot probed with anti-CyRPA antibodies were used as a positive loading control. The dashed rectangles represent areas of the immunoblots shown in Figure 2.

**Supplementary Figure 10: PCR to confirm integration of the repair plasmid into the *pfmsa180* locus.**

(a) Full size agarose gel picture showing diagnostic PCR products. Presence of correctly sized bands in lane I and II confirms integration of repair the plasmid (including a floxed 94 bp recodonised DNA sequence) in one transgenic parasite clone (clone 1) and differentiates it from wild type parasites (II-3 DiCre). Product sizes in lanes III between clone 1 and wild type parasites (II-3 DiCre) indicate the larger size of 980 bp after integration of the loxP-flanked repair DNA fragments, compared to 774 bp in the wild type parasites. The dashed rectangle represents the part of the agarose gel image shown in Figure 5b.

(b) Full size agarose gel picture showing PCR analysis of successful excision of a floxed recodonised *pfmsa180* sequence after the addition of rapamycin. C- Control DMSO treated parasites, R- Rapamycin treated parasites. Reduction of PCR band size in Lane III of 'R' compared to 'C' confirms the successful deletion of the floxed piece of DNA after rapamycin treatment. For band sizes please see Figure 5. The dashed rectangle represents part of the agarose gel image shown in Figure 5c.

**Supplementary Table 1: List of primers used for the cloning of PfMSA180 constructs and for the conditional gene knockout study**

| <b>Primer</b>    | <b>Sequence</b>                                |
|------------------|------------------------------------------------|
| MSA180C1FP       | CTATAGGGCCTTCGTGCATATGAATGAGAAAAATAGGAAAGCTATT |
| MSA180C1RP       | CTATAGGGTTATAGTCTCGAGAGTTGAATTGGGTGACGAA       |
| MSA180C2FP       | GTATACCTGAACTTGCAATATGAACAAAGAATCTTTAATCTTTCC  |
| MSA180C2RP       | GCTTGTGGCTCGAGATTATATATATTTTTTTGGATCATC        |
| MSA180C3FP       | CATGTATACGAATGCCATATGAATAATGTACACGATACAGC      |
| MSA180C3RP       | ACGCTTGGCTCGAGATCATTTTGTTCAGTGTTAG             |
| MSA180C4FP       | GTATGTAATGTGGCTAGCAATAAGGAAGAGGATATGAATG       |
| MSA180C4RP       | CTGACTACGTGCTCGAGATTTCTAAAATCTAGTGCATC         |
| MSA180NextFP     | ATGGTTCATTGTCCCTTTTTGTAGTG                     |
| MSA180NextRP     | GGCAAAGGGTTTGTGTTGATAAGGG                      |
| MSA180NintFP     | GAAGTTCGATAAGTTTATAGACGAGTTC                   |
| MSA180NintRP     | TATCGAACTTCTTAGAGTCTTTAGGG                     |
| MSA180_185guideF | <u>ATTGGAAGAATTA</u> AGTATGCAT                 |
| MSA180_185guideR | <u>AAACATGCATACTTTA</u> ATTCTTC                |

**Supplementary Table 2: Immunoprecipitation by PfMSA180 polyclonal antibodies.**

The antibodies were raised to PfMSA180 Construct 3 (C3) and Construct 4 (C4) and a significant number of peptides derived from MSA180 were observed. The Mass Spectrometry analysis was searched against the Plasmodium database on Uniprot<sup>4</sup>.

**Table 2a: List of proteins identified by the polyclonal antibodies**

| Accession | Description                                                  | Unique peptides | PSM |
|-----------|--------------------------------------------------------------|-----------------|-----|
| Q8IJQ4    | Uncharacterized protein PF3D7_1014100                        | 53              | 190 |
| Q8I0U8    | Merozoite surface protein 1 PF3D7_0930300                    | 45              | 136 |
| C6KTB4    | Acetyl-CoA synthetase, putative PF3D7_0627800                | 32              | 71  |
| Q8I0V3    | 60 kDa chaperonin PF3D7_1232100                              | 21              | 63  |
| Q8IE67    | Phosphoribosylpyrophosphate synthetase<br>PF3D7_1325100      | 15              | 41  |
| Q8IKF0    | Eukaryotic initiation factor 4A PF3D7_1468700                | 10              | 35  |
| Q8IKH8    | 40S ribosomal protein S3 PF3D7_1465900                       | 8               | 27  |
| Q8IAX5    | 40S ribosomal protein S16, putative PF3D7_0813900            | 6               | 24  |
| O97266    | Eukaryotic translation initiation factor 4E<br>PF3D7_0315100 | 7               | 22  |
| C6KT18    | Histone H2A PF3D7_0617800                                    | 3               | 17  |
| Q8I542    | Calcyclin binding protein, PF3D7_1238100                     | 5               | 10  |
| Q8IIX0    | 60S acidic ribosomal protein P1, putative<br>PF3D7_1103100   | 2               | 7   |

**Table 2b: List of PfMSA180 Peptides detected in immunoprecipitates with polyclonal antibodies**

| <b>Peptides Detected with C3 Antibody</b> |
|-------------------------------------------|
| IKGNSEEFSDNELPEQTESFPLNKPQDHEAFYNLK       |
| IHNILKDFNINENIMTNK                        |
| IKGNSEEFSDNELPEQTESFPLNKPQDHEAFYNLKK      |
| SAIDKYVHYEYKR                             |
| GNSEEFSDNELPEQTESFPLNKPQDHEAFYNLK         |
| KIANTIYVNVGQSGINGFFNFFDFREK               |
| KHHTNVYEPNDEEKQNEQK                       |
| NIYNMNNVHDTAYYHNSR                        |
| LTNNFKENDEGLKNENNINNEDNQNDNMNIVLGK        |
| NLTEFLENTER                               |
| NFYNISNENGDNTFNNNNNMMDNK                  |
| NFYNISNENGDNTFNNNNNMMDNKKR                |
| MNGKLPIDDPKNIYNMNNVHDTAYYHNSR             |
| NHMMLSNEQFINKNK                           |
| NNSETNENISESNGPELNNENSYSVK                |
| LSYFNLPSLK                                |
| INYIFFNYIPLINYVNGDALDFR                   |
| VTGDSVENINEQTNNNQYPNTEYNTIQR              |
| VGDQFFPTYSNLKG                            |
| VGDQFFPTYSNLKGDDHDLEHSAK                  |
| ELAEISTSNFLYFPKKDILR                      |
| ELAEISTSNFLYFPKK                          |
| ELAEISTSNFLYFPK                           |
| DNNYYYNNSDNNNYNER                         |
| DMPSLEDNFYEHKYPDINTIHIYYNASPVK            |
| ALLQQSNKDTPIHK                            |
| YFPTKDMPSLEDNFYEHKYPDINTIHIYYNASPVK       |
| YKDNNYYYNNSDNNNYNER                       |
| NLTEFLENTERINTFVR                         |
| NHMMLSNEQFINK                             |
| YPDINTIHIYYNASPVK                         |
| YMAENKFNLPMSSSEVENK                       |
| NYKNLTEFLENTER                            |
| VDVIDEK                                   |
| TIIDEIKSK                                 |
| ENDEGLKNENNINNEDNQNDNMNIVLGK              |
| ISENLNR                                   |
| LPIDDPKNIYNMNNVHDTAYYHNSR                 |
| DMPSLEDNFYEHKYPDINTIHIYYNASPVKLNNEVNDLK   |
| DMQGNNIKIEQNK                             |
| ANQQFFSYK                                 |
| MNEFDYINNFSASYLLNQLIIFQDKFNYIK            |

|                                           |
|-------------------------------------------|
| ITSDILYK                                  |
| FIPINAFITLENK                             |
| IFYINSYR                                  |
| MVNDTWITPYAFVVYSK                         |
| HHTNVYEPNDEEKQNEQK                        |
| NHMMLSNEQFINKNKYAK                        |
| FNLPMSSSEVENK                             |
| SAIDKYVHYEYK                              |
| <b>Peptides Detected with C4 Antibody</b> |
| IKGNSEEFSDNELPEQTESFPLNKPQDHEAFYNLK       |
| IHNILKDFNINENIMTNK                        |
| SAIDKYVHYEYKR                             |
| GNSEEFSDNELPEQTESFPLNKPQDHEAFYNLK         |
| NIYNMNNVHDTAYYHNSR                        |
| NLTEFLENTER                               |
| NFYNISNENGDNTFNNNNNNMDNK                  |
| NFYNISNENGDNTFNNNNNNMDNKKR                |
| LNEVNDLK                                  |
| INYIFFNYIPLENYVNNGDALDFR                  |
| VTGDSVENINEQTNNNQYPNTEYNTIQR              |
| VGDQFFPTYSNLGK                            |
| VGDQFFPTYSNLGKDDHDLEHSAK                  |
| ELAEISTSNLFYPPKKDIILR                     |
| ELAEISTSNLFYPPK                           |
| ELAEISTSNLFYPPK                           |
| DMPSLEDNFYEHKYPDINTIHIYYNASPVK            |
| YKDNNYYNNSDNNNYNER                        |
| NLTEFLENTERINTFVR                         |
| NHMMLSNEQFINK                             |
| NYKNLTEFLENTER                            |
| VDVIDEK                                   |
| TIIDEIKSK                                 |
| ENDEGLKNENNINNEDNQNDNMNIVLGK              |
| ISENLNR                                   |
| DFNINENIMTNK                              |
| ANQQFFSYK                                 |
| MNGKLPIDDPK                               |
| ITSDILYK                                  |
| FIPINAFITLENK                             |
| IFYINSYR                                  |
| FNLPMSSSEVENK                             |



## References:

1. Withers-martinez, C. *et al.* Plasmodium subtilisin-like protease 1 ( SUB1 ): Insights into the active-site structure , specificity and function of a pan-malaria drug target. *Int. J. Parasitol.* **42**, 597–612 (2012).
2. Knuepfer, E., Napiorkowska, M., Ooij, C. Van & Holder, A. A. Generating conditional gene knockouts in Plasmodium – a toolkit to produce stable DiCre recombinase-expressing parasite lines using CRISPR / Cas9. *Sci. Rep.* 1–12 (2017).  
doi:10.1038/s41598-017-03984-3
3. Jones, M. L. *et al.* A versatile strategy for rapid conditional genome engineering using loxP sites in a small synthetic intron in Plasmodium falciparum. *Sci. Rep.* 1–9 (2016).  
doi:10.1038/srep21800
4. Consortium, T. U. The Universal Protein Resource ( UniProt ). **36**, 190–195 (2008).

Supplementary Figure 1:

```

PF3D7      MNRIFYFCLFTILFWLSLVSGENVNKNKCNEKNRKAILLALLKNSLVDNKDYNNSEELKY 60
PmUG01    MLRIAYFSLFSFIILSFLFFSGHNAL-PNEEDKNKKAILLALLTNTFINNKEYKNGEDINI 59
PocGH01   MLRIIYFSFFPILFSLFLISGHDAI-SNVEDKTKKAILLALLKNTFIDNEEYKEPNDLNN 59
PKNH      MSRITFLFSLSILFFFFLLPGQNAL-TIDDDKNKRATLLALLKNTFIDNKGKKSDDIKG 59
PVP01     MPRITPLFLLSILLSFFLFSGQNAL-TNDDDTNKRATLLALLKNTFIDNTENKKPDDINT 59
* **      :      *:: : :. *...      :.....* *****.*.....*      :: :...

PF3D7      ALEHIQNSELYPKDSKKFDFKFIDEFFSYYNIHVNFTDEEKRI LHISGVFKEFYVDVDNLN 120
PmUG01    ALENINNMKLHPTDNDKFDKFLDALFKHHNIYVTLDDHDKRII HISGVLSEFYVDVDTLT 119
PocGH01   ALENINNMNIHPTDNNKFDNFLEELFKHYNVHVTFSDMDKRILHTSGVFNDIYVDVNSLD 119
PKNH      ALENIKNMTLQPTDTDKFDKFLDQFLKFFQIYVTFSDKDKRVLHLSGVLNDVYVDVDSLS 119
PVP01     ALENINNMTLHPTDTDKFNKFLDHFLKFFHIIYVSFSDKDKRVLHLSGVLNEVYVDVESLS 119
***:*:*   : *.*..**::*:: :.....:*. : * :*:*:* ***:..* ***:..*

PF3D7      KDEMKEYFKKNYEKGLSLINLIVHSNLI IQQFDHDIIDKKKVH----- 163
PmUG01    EEKQKEYFNTRYEKGHTLINLILHSNLIHTKHDKDVNKENHKEETKPNHPD SPIPDEEPN 179
PocGH01   KGNTKEYFNNGIHKKALSLINLVLHSNLVHPKYAEINIEKGSQTGNDLIQENS-----QD 173
PKNH      KENLQKHFDLSLYEKGLNLINLIVHSNLVHPKYDETEMHGVDAEEKDH----- 166
PVP01     EENLQKHFDVSEKGLNLINLIVHSNLVHPKYDETAVQMEGEEPEQ----- 166
: : ::* . : :* . *****:****: : . . .

PF3D7      ----- 163
PmUG01    LEKEPIPDVSKGEVNHQLNYNNVYDSDIEVESNHEVEPNHEVEPNHAVEPNHAVEPNHA 239
PocGH01   TEG-----EPKGN-----TGE GHEPVYDFKNNQGGE PDNAYGHI-- 207
PKNH      VS----- 168
PVP01     TDG-----PTEGP-----GSHG-----KVDPPQEGDPQEEEGPSQE 197

PF3D7      ----- 163
PmUG01    VEPNHAVEPNHATEPNHATEPNPENEPIDDVSKGEVNHQLNYNNVYDSDIEVESNHEVE 299
PocGH01   ----- 207
PKNH      ----- 168
PVP01     GHPQEK----- 203

PF3D7      ----- 163
PmUG01    PNHEVEPNHAVEPNHAVEPNHATEPNHATEPNHATEPNHAVEPNHATEPNPENEPNPENE 359
PocGH01   -----QGEEPVHEYEYNQGGE PDNACEHIQGE EEPVH---EY---EY-----N 243
PKNH      -----DNYAENIKGPAHYEESQ---EY-----E 188
PVP01     ----VDPTQENHPHEKVDPPQEGDPAQESH PHQKDGPAQQDHSQ---EY-----A 246

PF3D7      ----- 163
PmUG01    PIPDDVSKGEVNHQLNYNNVYDSDIEVEPNHAAE PNPENEPIDDVSKGE-VNHQLNYYN 418
PocGH01   QGE-----EPVHEYEYNQG-----EEP-----VHEYEYSQGEEPVHEYEYNQ 280
PKNH      EMP-----EYADHYHYGGN-----KED-----PDDMDYENGEEYDAQKYQDD 225
PVP01     VTP-----EYADHYHYGGH-----EED-----PEDMDYENGEEYDAQGDPDD 283

PF3D7      ----- 163
PmUG01    VYGSDEHEDETNHETEFKQEETHNYEYEAQVED--EHKEHYEHSHTNEPEKEVAHSYEA EH 476
PocGH01   G-----EEPVHEYEYNQGEEPVHEYEYHNQEGESDN-----A-----YEL-YHGGD 319
PKNH      H-----YHHDDEYEEYEQDHANHDNHDHDDHNDHDDHNDHDDH-----NDHDDHNDH 273
PVP01     H-----DEHYEFD----- 291

```

PF3D7 -----EQNTNTNKTLEYISDNLNDLINFKNIHLNNSNSTGDFII 201  
PmUG01 KKEDKPMQENEENEYQYGDDEEYDEEEFKNKNVEYIQKKLKNLLAMKSIKLNNNSNGEFKV 536  
PocGH01 I-----TEEYDNEGH---NEENYKKNKIYVGGKLLKNLLAMKNIKLNNSNSTGFEKV 368  
PKNH N-----DHNDHDDHNDHDDDEEEKQKIYVGGKLLKNLLAMKNIKLNNSNSTGFEKV 325  
VVP01 -----EHDEHDEHGEHDEPHYHEEDKKKIKYVGGKLLKNLLAMKNIKLNNSNSTGFEKV 342  
 . : . . . : . : \* . : \* \* : . : \* . : \* \* . : \* . : \* \* . : \* . : \*

PF3D7 KLYTNYVNYIN-PYQTNPLPNTPHYEYHKNFHTEHYI-----YDEEIVNPMDNINT 253  
PmUG01 NFYTNYVNYINQPPSNS-GSNHQEKYETEINQESKKKKKKS-----D 578  
PocGH01 NFYTNYVNYIS-PYSINPFPSQDMHKDNKVYEEGRNGKEEKYDEYSGGVSDGDK--DDS 425  
PKNH NFYTNYMNYINTPYVEPPFPFHKDIYEAEVYSGDKIYPKD----- 366  
VVP01 NFYTNYVNYINTPYGAPLLPFHKSIEYAEVYSGDKLHPPK----- 383  
 : \* \* \* \* : \* \* \* \* . \* . : . : . : . :

PF3D7 HTEEDNVYV-----SATKGNQKEETEK-KENHENNAINPKYMN----- 291  
PmUG01 KMDYNSYFVKEVPTVVGEDDG-----EGDDIVNTNDIKQVNEENLYNTNKAYDHMYNK 630  
PocGH01 SGSHGGYAGK-----EGETEDGYNKYRNAIRNIYEKMNNQSE-EEHEEYEE 471  
PKNH HKDDNIYYGGENELIPQHVKGEMQKEALQEGSYHGYKSTMKGMYENIKKRSK-KK----- 420  
VVP01 HGDEQMYVVGEKELIPVHGKGDMDQK---EGPYDVYKGAMKGIYENIKKAA-KK----- 433  
 . : . : . :

PF3D7 -----YETYYKKIFNAIFEQIDKLNKTLFEIKNKNNSSETNEN----- 328  
PmUG01 K-----IEGMEEKANKYYPYDDSS-----EYA-----DNARYLKKGN--- 662  
PocGH01 NAGEEQGKEGNEKERDQWKDENSE-----G-----ERCKRDEHFV----- 507  
PKNH -----ECKSGWCGKMMAG-----KYQMMDHNNCNDENNDG----- 451  
VVP01 -----GGKNGWVGKMMAG-----KYQIKEDSNGDDDDDEDGDDGDD 470  
 : : :

PF3D7 -----ISESNSGNPELNNSYVSVKLSS 352  
PmUG01 -----ELNKEGNYYYDDGKTQHRRSN---EYEQDRGNINGMKMSNK 702  
PocGH01 -----EEETEYAD-SYFDGEDDV-NRKYTEEEEQTEYSQKDDVEGMQLGNK 550  
PKNH -----NDHDDHDEDDQLQNEQLLHQGHGTKKKSKCAHN--NKKLHGQNVDDKEITDK 500  
VVP01 DDDDDNGDDDDDEDPEDDQLQNEPLHKGHPNKKPKYGHK--KKKIHGENVDDDEETDK 528  
 . : . : . :

PF3D7 SPNSTNKESLIFPYTYNPPYMFRLTNNFKENDEGLK-----NENNI-----N 395  
PmUG01 KPGKSEAKASHFPYTYNPPYMYSLNSTGSPKYNNSKYNNGYTNHNNNEYNNEYSNKYN 762  
PocGH01 -SPTGEKKGLNFSYTFYNPYYMRLGSKI PDNEKINK-NDKSYHIVK----- 596  
PKNH APAEKEKKGIDFSYTYHNPYYMFKLGSSMPTGK-----GGH-----LK 538  
VVP01 APSEKGGKIDFAITTYNPPYMFKLGSMPTGKKAQP-SGKGAPAKGGL-----LK 578  
 : . \* \* \* : \* \* \* : \* \* . :

PF3D7 -----NN--EDNQDNMN----- 406  
PmUG01 DKYNDKYNNKYSNKYSNKYNNEYNNEYNNEYNNEYNNEYNNEYNNEYNNEYNNEYNNEYN 822  
PocGH01 -----QEKLVE-----EKWK----- 607  
PKNH -----GGKDDKEEEEEVDD----- 553  
VVP01 -----GGKGHDEEEEEVADE-----EEEEEE----- 599  
 : : . :

PF3D7 -----IVLGIHNIL 416  
PmUG01 NEYNNKYNKYNKYSKYSKYSRYKKNNNNYNNKKNKQKSLYDFMLQKALEKE-HML 881  
PocGH01 -----D----- 608  
PKNH ----- 553  
VVP01 -----EAEEVADAE-----DVADEEADAEVADAD-ADV 626

PF3D7 KDFNINENIMTNKMSAPLIMTIIILNFFKKYMAENKFNLPMSSEVENKINKSNNKALLQQS 476  
 PmUG01 KNNYENQESNTKKNKIGLFLDTLLE-LARYIESTINKNKINASKMKNNQLGDNKHDAIQQ 940  
 PocGH01 -STSIDYENITNKNSVEYFFNTLLE-LADYVAKNMNKSNLGNGKKK-KHLGDQHVLLQN 665  
 PKNH --ENGMEKNIEGESGANTFVNTLLE-LEGYVQPKSEH-----S-ELKEDKNTLGQS 601  
 PVP01 TDGDAAEKQHAKKSAANLFVNTLLE-LAGYLEPSESKK-----S-ELKEDKNSLGQA 676  
           :      :      :.   :   :   \*   :   :          .   :   ::   \*

PF3D7 NKDTPIHKKKEIRNKKIQTKVDVIDEKTKKKIANTIYVNVGQSGINGFFNFFDFREKSID 536  
 PmUG01 SKKRPIHKKKEMKSRKMKTKTKDLVDEKEKEKIQDTMFVKIGQNGTIGLLNFFDFREGLLK 1000  
 PocGH01 GKNRPIYKKKEMKSKMKTKKDEIDENMVNKI KDTMYFKVGQNGTNNFLNFFDFREDTLK 725  
 PKNH NKNRPIYKKKEMKSRKMKTKKDIPEKITEKVKDTMYVKVGQNGTNGFLNFFDFREHSLK 661  
 PVP01 NKS RPIYKKKEMKSRKMKTKKDIVDEKTTEKIKDTMYVKVGQNGTNGFLNFFDFREYAVK 736  
   .\*.  \*\*:\*:\*:\*:\*:\*:\*:\*:\*  \*  \*\*   :   :   :   :   :   :   \*   .   \*   ..:\*\*\*\*\*  :.

PF3D7 SNIFDLLHVMEDMKIFDIFQTIIFIQKFTEENVCASYCMNITDVLELSHYDMIFYDKMVFH 596  
 PmUG01 NNFKDLIYVMEYLNVFNITETIMFQKFTESICASYCMGITNVLELSNNDMLLYEKMRLI 1060  
 PocGH01 KNFTDLLLIMEQLKVFTISETIMFQKFTETICASYCMGITDVLELSNNDMLLYEKMSIH 785  
 PKNH KNFEDLLKVMFLKVFNITETIIFIEKFTQSVCASYCMGITDVLELVNNDMLLYEKMSFH 721  
 PVP01 ENFKDLLKVMETLKVFNITETIIFIQKFTESVCASYCMGITDVLELVNNDMLLYEKMSFH 796  
   .:.  \*\*   :   \*\*   :   :   \*  \*  :   \*\*:\*:\*:\*:\*:\*:.:\*\*\*\*\*.\*.\*:\*:\*:\*   :   \*\*:.:\*\*\*   :

PF3D7 FSKDGMMIKT-DKKYLYNLKEFENILNLLNINANTIALNCTCKFYVDVNYTYSEQYKMH 655  
 PmUG01 FNNQGMTVVTKNSEYEFNDAEFEKFLLLNLNKYTIPLNCPCKFYTNNIISYIYQNSGL 1120  
 PocGH01 FDSKGMTVILENTEHHFSDTEFERILNLLNINKDTIPLTCPCKFYTNNIISYCKQYKSSL 845  
 PKNH FHKNGMIVTT-NSNYEFNGIEFESLLDLLNINKETIPLICPKSYTNNIISYQQYKYNM 780  
 PVP01 FRKNGMTVTT-NSNYEFNGINFESLLALLNINKETIPLTCPCKSYTNNIISYCKQYKSNL 855  
   \*  ..\*\*  :   :   :   :   .   :   \*\*   :   \*   \*\*\*:\*  \*   \*   \*   \*   \*   \*   .   :   :\*   \*\*   :

PF3D7 KGYLHKMNEFDYINNFSASYLLNQLIIFQDKFNKIKMNGKLPIDDPKN---IYNMNNVHD 712  
 PmUG01 KGNFYQLKKSQFTEKFSPSYLLDKLIVLQDKLNYIRKHGKLEVNKRAVKNEDEDDDDDFHE 1180  
 PocGH01 KGYFEQSKKAAYINKFSISYILQOLENLQEKLYYIKKNGKLECKQSSK---CYDGNLDLYN 902  
 PKNH KGYFTQSNNSEYLEKFDAYYLLLEDLILLEEKLNIDIKKNGKISSDKFVN---ILDSKDLTY 837  
 PVP01 KGYFTQSKNSEYLEKFTPYLLEQLILLEDKLNLIKKNGKISSDTSVK---NLESKDLHT 912  
   \*\*  :   :   :   :   :   \*  \*:\*:\*.\*  :   :   \*   :   \*\*   :   .          :   :   :   :

PF3D7 TAYYHNSRYFPTKDMPSLE-----DN 733  
 PmUG01 NVYYHKQRYIPTIRTLNVENNSNT-----TDN 1207  
 PocGH01 TAYYHNSRYFPTITTLNVSDGCSNGND-GSDGSDRS DGSGGSGGS-DGSDGSGDEGNQVK 960  
 PKNH TAYYHNSRYFPPLRTCSASTTAPVINVSDKSAPNLASGFGEKVVDI GLSKHGSNKAGVA 897  
 PVP01 TAYYHNSRYFPPLKASSASSTAPVSAVGGKSGLN RVGGFGGNGVDGNGVSSHGNSHGGGE 972  
   ..\*\*\*:.\*\*:\*          .   .

PF3D7 FYEHLKYPDINTIHIYYNASPVKLNEVNDLKTIIIDEIKSKIIFYINSYRVGDQFFPTYSN 793  
 PmUG01 TVNNFTYPPDMDLLIVYYNSPLVNFKNLTDVKNILIEEVNSKIFYINSFRIGNQFFPTYSN 1267  
 PocGH01 TEVHLKYPDVETINVYYNASPVNLKVNVDVKNVLIBEVKSKIFYINSYRIGNQFFPTYSN 1020  
 PKNH TGDKLTYPDVALNIYYNASPVNLKNIQDVKSVLIDEVKSKIFYINSYRIGNQFFPTYSN 957  
 PVP01 LADELKYPDVTDLNIYYNASPVNLKSIHDVKNVLIBEVKSKIFYINSYRIGNQFFPTYSN 1032  
   .:.\*\*\*:.:   :   \*\*\*:  \*:.:.:  \*:\*:.:\*\*\*:\*\*\*\*\*.\*:\*:\*  \*   \*   \*

PF3D7 LGKDDHDLEHSAKNFYNISNENGDNFTFNNNNNMMDNKKRMYNYNKHKDNDSDRYTDNSNKN 853  
 PmUG01 LGKDDHDLEILEEVNASKINAPSRN-----1292  
 PocGH01 FKGDDHDLEIMEAVNTSKSKGENNS-----1045  
 PKNH QGKDDHDLEIMQSDNSSKMNVEDKT-----982  
 PVP01 LGKDDHDLEILESANSKLVKEGRT-----1057  
   \*\*\*\*\*          .   :   .   .

PF3D7 RDNSNKNRDNYNRNKDKNNTNRDNYNRYKDNNYYNNSDNNNYNERKRYIRKKTYNKLSY 913  
PmUG01 -----SGKSTSKST-----TSNQNGKHVSHLGC 1316  
PocGH01 -----VRQEYYRNGKKEG-NRRG-----EGKYVGGKGGEKSRVNSELAY 1083  
PKNH -----N-----KRI PKLGH 991  
PVP01 -----S-----KRSPKLGH 1066

: . \* .

PF3D7 FNLPSLKSIIYNNKIKGNSEEF-----SFDNELPEQTES 946  
PmUG01 FTLPNVKSLDKHNNKQEDNF-----LSSPIKVQGDCEW 1350  
PocGH01 FASPTVDELLKQSKGENSGHSADSADASSIANT-----ANAVDVEGDDQSDSARDSGDW 1137  
PKNH FVVPKLESVQKHSKEENKNAC-----IGGCSDDSSDDCEDESHVKHGIVGNSDL 1042  
PVP01 FVVPKLESVQKHSKEENKNAC-----IGGCSDDSSDDCEDESHVKHGIVGNSDL 1126

\* \* . . . . : : . . . . : :

PF3D7 FPLNKPQDHEAFYNLKKHHTNVYEPNDEEKQNEQKL--KDQIKITSDILYKDIEENKNT 1004  
PmUG01 VPLKSPQNYEDFYNEKKRNTGLFEKSEESN-NENKL--SDDLNLKYNFFENGDI DNKKEE 1407  
PocGH01 VPLKSPKNHEDFYNERKRYTNLFEDKTEKK-KKNVV--EDRLNLKYDFLEKEDKE----- 1189  
PKNH IPLKSPPNHEDFYNAKKLQMNLFHDHGGNKL-NEKEMEEKDGFILKFTSLEK GARANKAPE 1101  
PVP01 IPLKSPPNHEDFYNAKKRHTNLLDHEGKQL-CEKKMDDSDCVSLKCAFLEK DARAKESGE 1185

. \* : \* : \* \* \* : \* : : : . \* . . . : :

PF3D7 DVLLIETITINNGTTSNTIENNKDSNKEAENSNT EQNDNNNDNNNNINNNNNNDNKEE 1064  
PmUG01 DLYAK-NIHANDTSETDSLPLNGKTK-----K-----KYHSNKS- 1440  
PocGH01 -----NYNTDDT- 1196  
PKNH TVEKNS-----DEGDNQKIDGGVTTG----GEDQA-----E-----TENDE- 1133  
PVP01 CDKEVVDKHTGDKEASDKQTGEGGET-D----GADQA-----E-----SQNNVNESEE- 1228

. .

PF3D7 DMNENNNNSKVTGDSVENINEQTNNNQYPNTEYNTIQRSINAKYLIFFFKNLHVWKTDLF 1124  
PmUG01 -----NI-SSNSNSNIGNNDNSNVKKSIAKAKYLIYFFKNIHVWKTQVY 1482  
PocGH01 -----NLINSVKLKSRRMGTNAEKKKKVINAKYLIYFFKNIHVWKT SVY 1240  
PKNH -----HSVDSLKLLNKMEKTYLHKKKKTISAKYLIYFFKNVHVWKTGEY 1177  
PVP01 -----HSAESLKLQSKMGEPLSCKKKKKAISAKYLIYFFKNVHVWKTGEY 1272

. . . . . : : \* . \* \* \* \* : \* \* \* \* \* : \* \* \* \* \* :

PF3D7 CQNINYMNNYLNSIQYNKTLTFDINYDTNAVITYFTDNITYTVKVNLEYLVFLLLEKISLI 1184  
PmUG01 CQNMNYINNLLLENINYDEDIIFQENLEEDIVYVYFTSKLGVKYDIDVNYFIFLLQKISLI 1542  
PocGH01 CQNMNYIDNLLKNINYNEDIVFQESVENGTVSLLFSSNLKDIYKIDMDYFIFLLQKISLI 1300  
PKNH CQNMNYIDKFLKSINYKEEITFQEHLDQDSVVLQFTSSLKNIYKVDMDYFIFLLQKISLI 1237  
PVP01 CQNVNYIDNWLKKNINYNEEIIIFQEQLDEDSVVLVYFSSNLKDKYKLDMEYFIFLLQKISLI 1332

\* \* \* \* \* : \* : \* : \* : \* : \* : \* : \* : \* : \* : \* : \* : \* : \* : \* : \* :

PF3D7 TFVEDLCSLFDTDKKNRYKNLTFLENTERTINTFVRNHMMLSNEQFINKNKYAKELAEIS 1244  
PmUG01 MYVEDLCGIFQLDDVKQKQKLDRLHLENTTNTQNFIEKHIIFFYEQYSNKNKYAKQLSNIS 1602  
PocGH01 MYVEDLCGIFQLDEVKKNKKIDKYLEKKGNIHFFLEKHIIFSHEQYIKKNKYARKLSDVS 1360  
PKNH MYVEDLCEIFQIEEMKQNKIDKYIENEANIVNFIEKHLMF SHEQYSKKNKYAKELSIIS 1297  
PVP01 MYVEDLCGIFQIDEMKQNKIDKHIEANIPANIHNFMEKHILFSHEQYSKKNKYAKELSIIS 1392

: \* \* \* \* \* : \* : . . : : : : . . \* : \* : \* : \* : \* : \* : \* : \* : \* : \* :

PF3D7 TSNLFYPPKDIILRSTPYNNIILDEKDIYQTFIFYMDDMLTEKMVNDTWITPYAFVVYSK 1304  
PmUG01 TSTFFSSKKDIILNTESYNNIIFNEKDIYDVMFIYMEDVLTEKMVIDTWLTPYGFMLYKP 1662  
PocGH01 TSNFFSSKKDIIFNPEPYNNVIFNEKEIYESLHTYMEDVLTEKMLNETWLTPYGFMLYSP 1420  
PKNH TSNLFSSKKDIILNSQPYNNIVFNEKEIYESLFYIMEDVLTERMMNATWLTPYGFILYKQ 1357  
PVP01 TSNFFSSKKDIILNSQPYNNIVFNEKEIYESLYVYMEDVLTERMINETWLTPYGFILCKP 1452

\* \* . : \* \* \* \* \* . \* \* \* \* \* : \* \* \* \* \* : \* \* \* \* \* : \* \* \* \* \* : \* \* \* \* \* :

PF3D7 SKKD--MQGNNIKIEQNKNITKYSRSAIDKYVHYEYKRISENLNRFFMESNSNAPQFNEN 1362  
PmUG01 NNDSGNNDNIKLSISKNEITKHSRNSIDKYL FYEYKKISNNILQYYDDLNSKIPQFKDN 1722  
PocGH01 NK-A--NSKYKLKISQNVHITKYSRNAIDKYIYYEYKKISNNIQYYEELNPKIHEYSDD 1477  
PKNH PSKD--LNSYKLIKIAQNEFITKFSRSAIDKYMYYEYRKISNNIVQHHVELSPKLGENLAE 1415  
PVP01 TLSD--ANNYKLKISQNEFITKYSRSAIDKYMYYEYRKIGNNIVQHHLDLSPKLSEHLAE 1510

. :.:\* :\* :\*\*\*.\*.:.\*\*\*\*\*:.\*\*\*:\*.:\* :.. : . : : :

PF3D7 YKEYTIIIYNDNPSMPNIVLTTTINVFNVSLQS IMEMLLNIKANQQFFSYKGFIPINA 1422  
PmUG01 LKEYKLVIYNDNPSMTNIVLTTTINVLNVALLOSILEVVLEIKANQQFFSYNGKFISLNT 1782  
PocGH01 LKEYKLVIYNDNPSMTNIIIRTTVNVLNIAFLQSLLEVLDIRADQQFFSFKGKFLPVNA 1537  
PKNH PKEYKLIYNDNPSMTNIIITTSINVLNISFLHSLEIILDIRATQQFFSYKGRFIPINA 1475  
PVP01 LKEYRLIIYNDNPSMTNIIITTTVNVLNIAFLQSLLEVLDIRATQQFFSYKGRFIPINA 1570

\*\*\* :.:\*\*\*\*\* \*\*.: \*:.\*\*\*:\*.:.\*\*\*:\*.:\* \*\*\*\*\*:.\*\*\*: :.:

PF3D7 FITLENKINYIFFNYIPLINYVNNGDALDFRNP 1455  
PmUG01 FIILDEGINYLFFNYIPNENHPALSNTGYA--- 1812  
PocGH01 FLILDEGINYLFFNYVPNENHINFTCV----- 1565  
PKNH FIILDEGVNLYFFNYAPNENHINEEA----- 1501  
PVP01 FIILDEGVNLYFFNYVPNENHINYAA----- 1596

\*: \*.: :\*:\*\*\*\*\* \* \*:

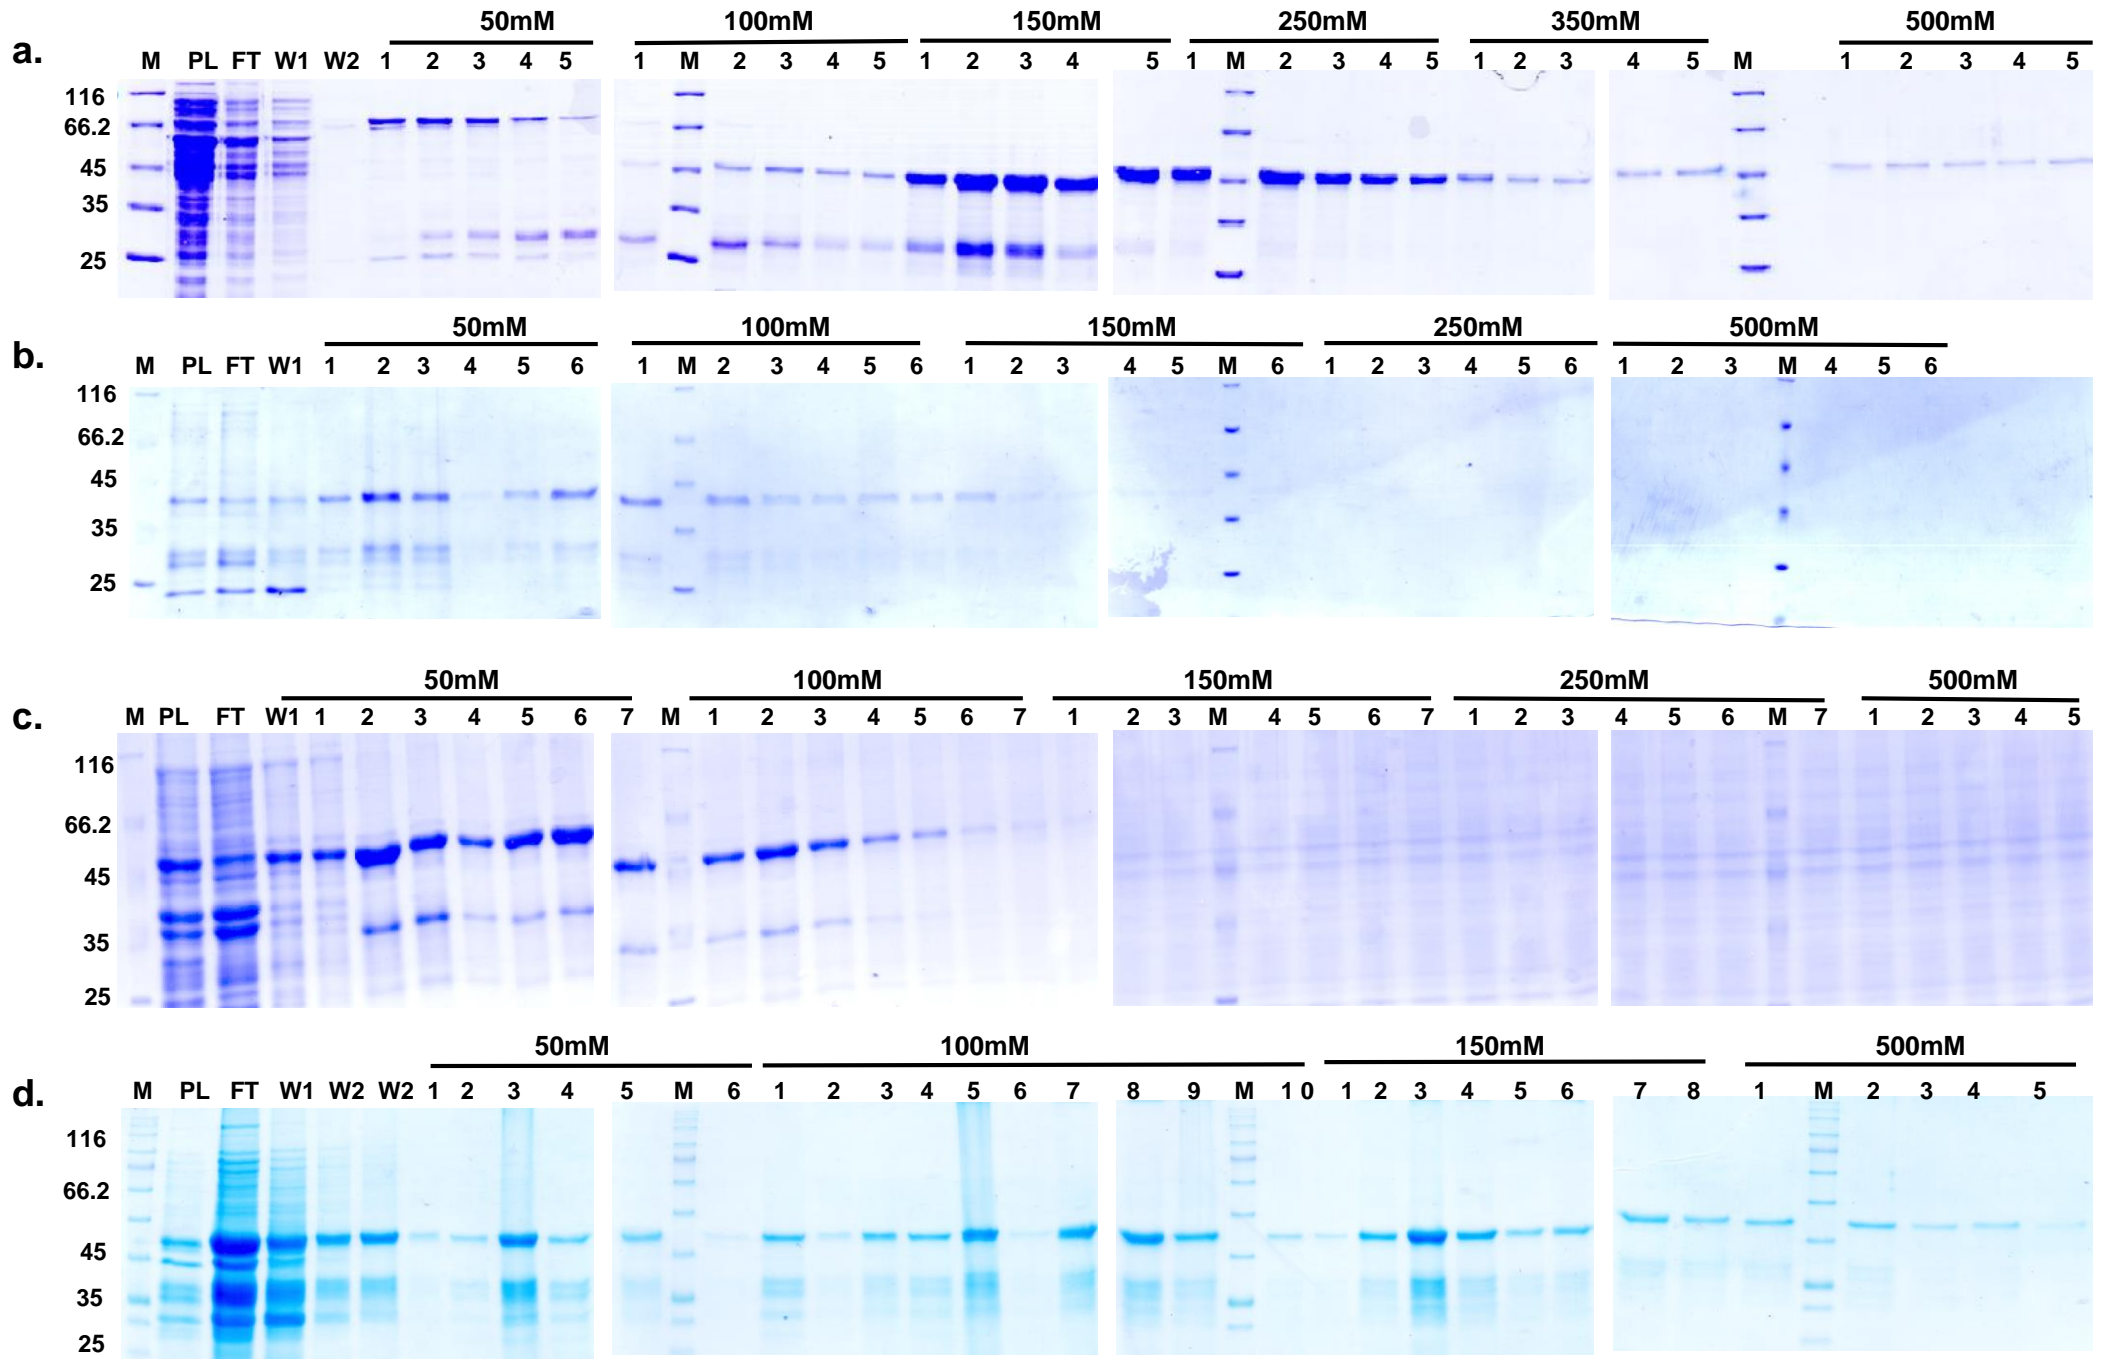

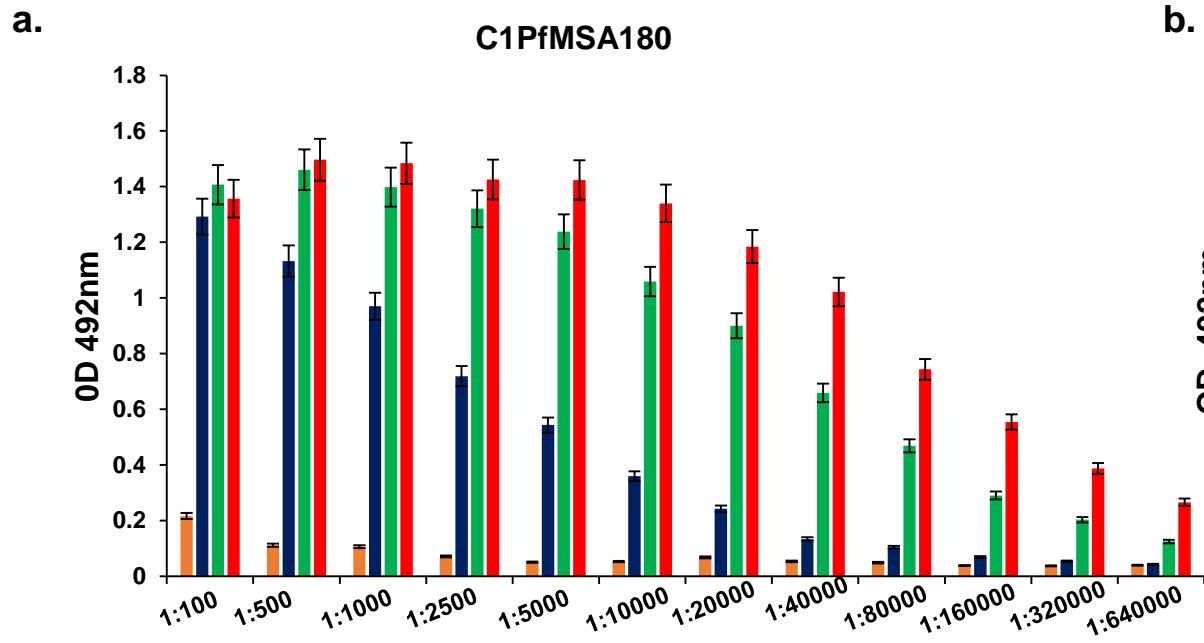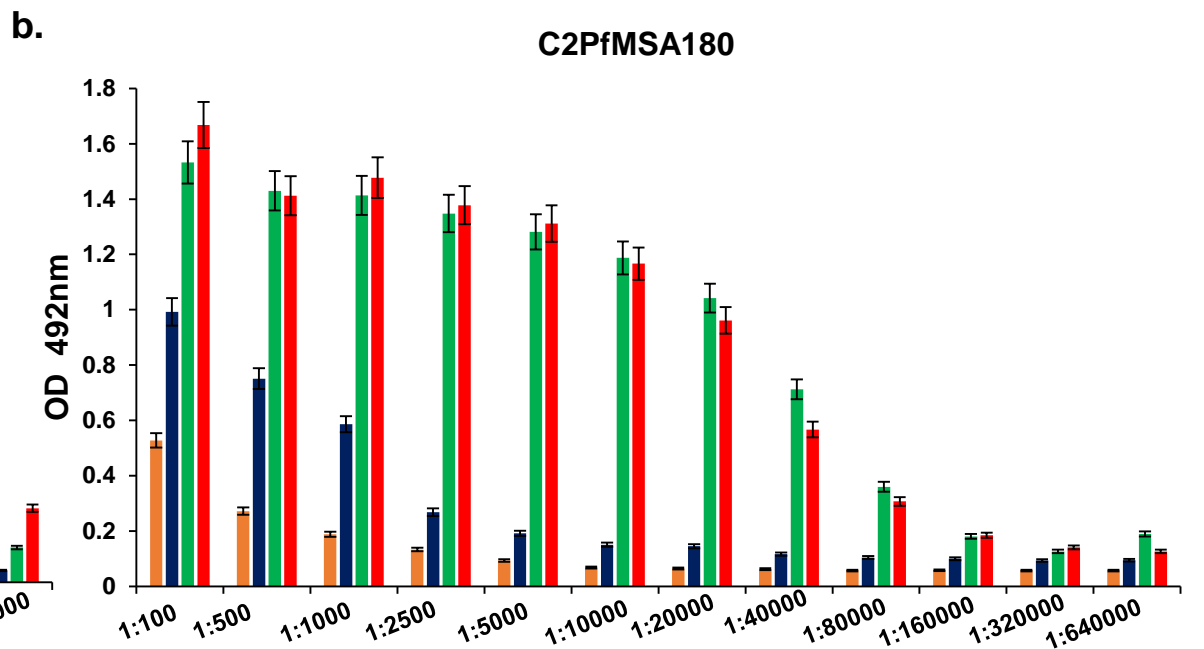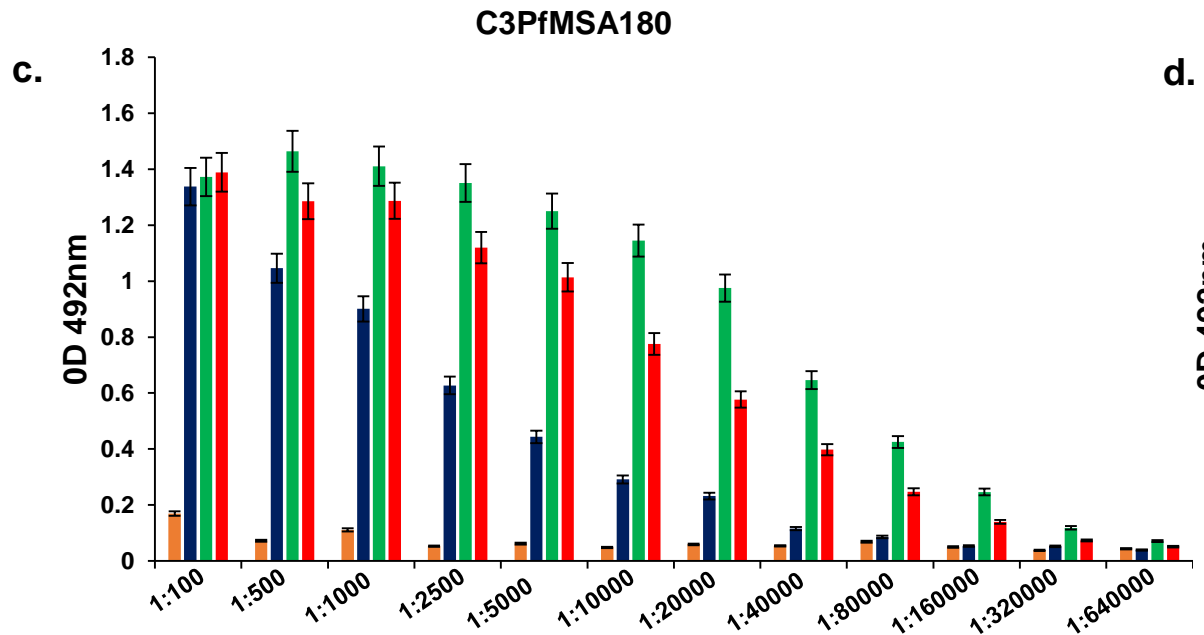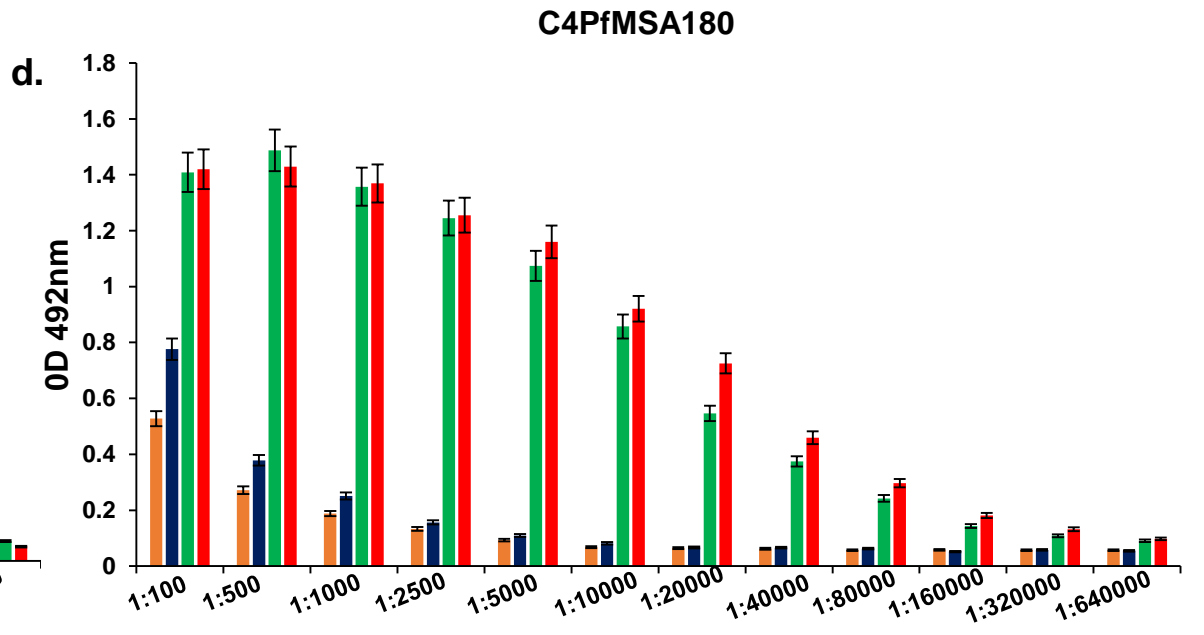

■ Pre-Immune   
 ■ Day 14   
 ■ Day 42   
 ■ Day 70



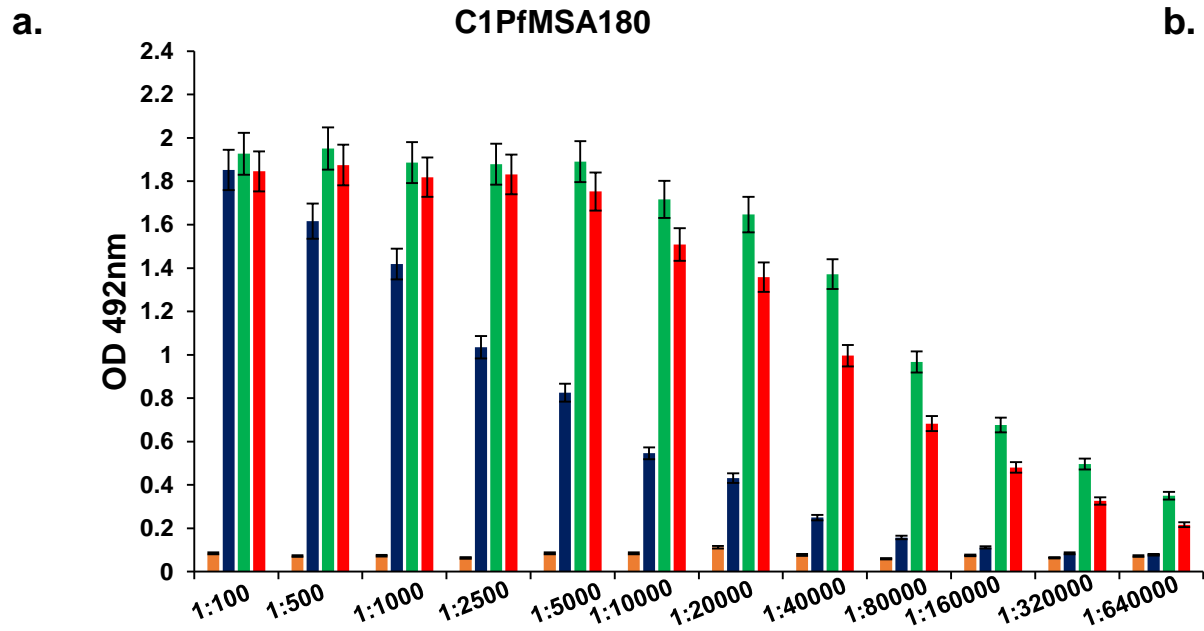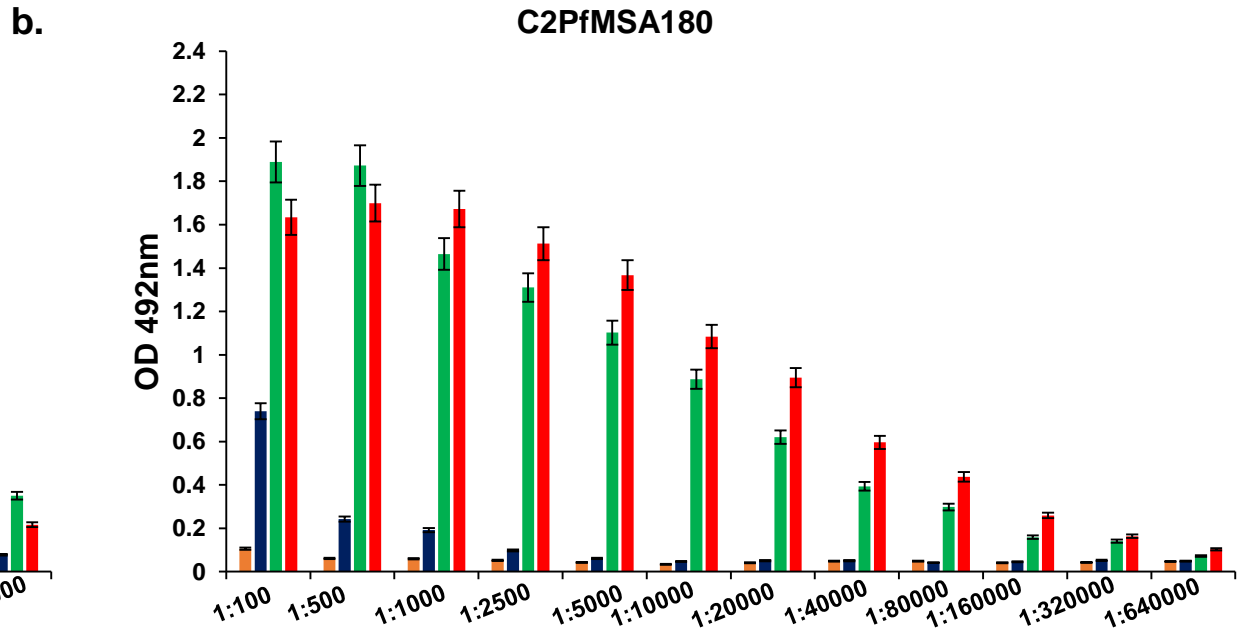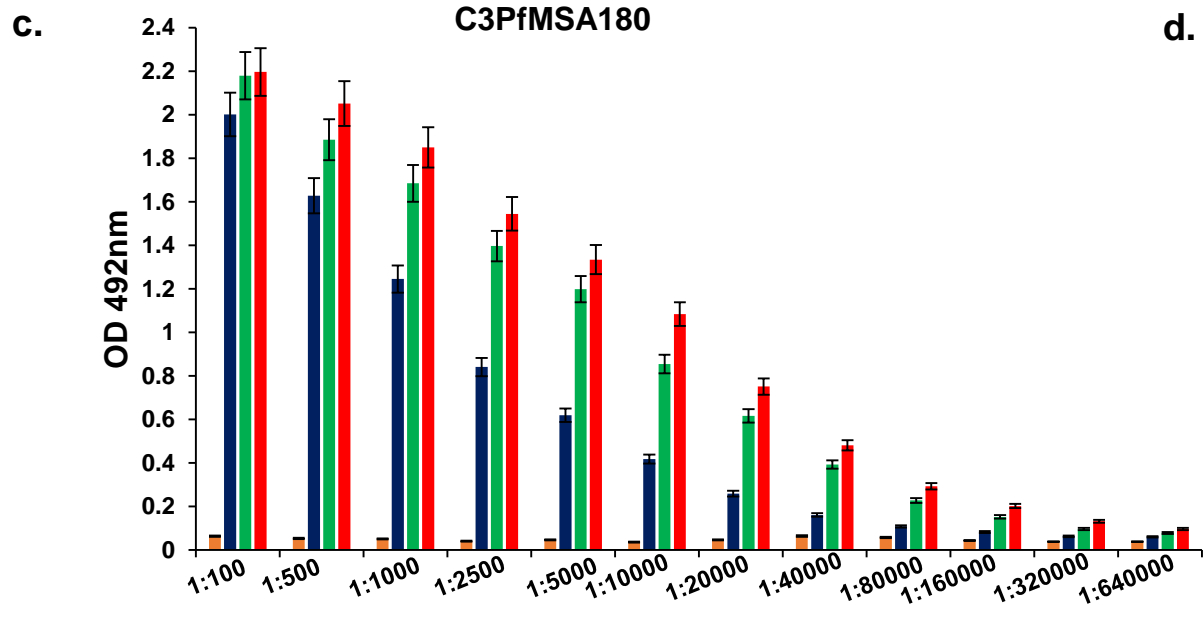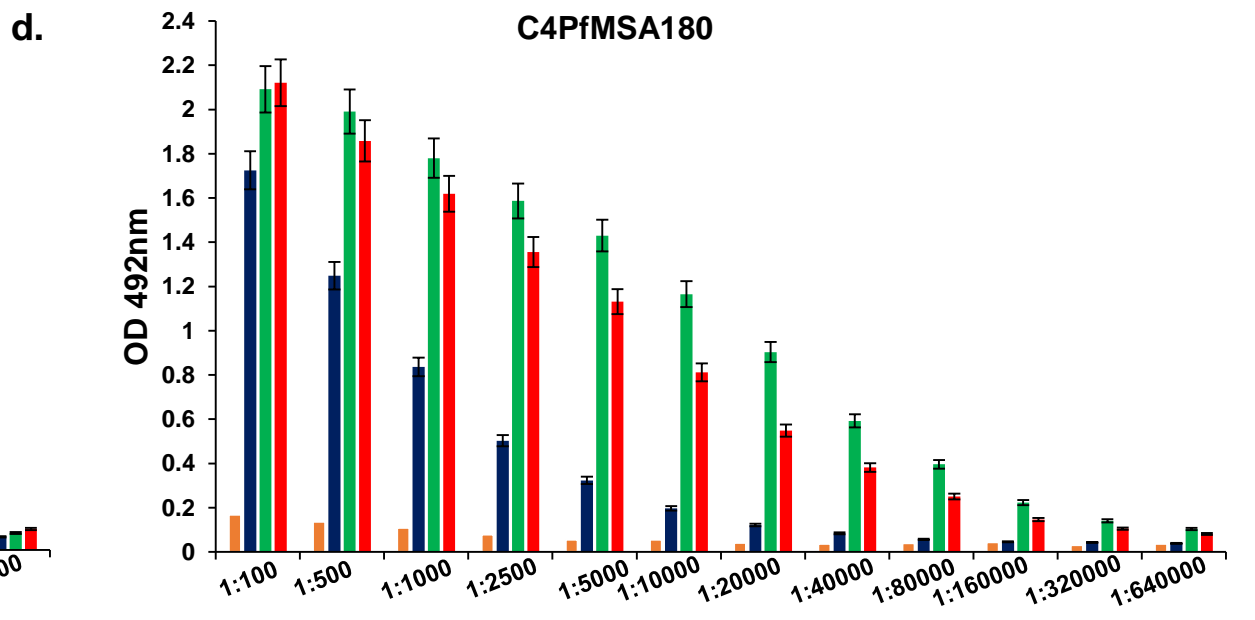

■ Pre-Immune   
 ■ Day 14   
 ■ Day 42   
 ■ Day 70

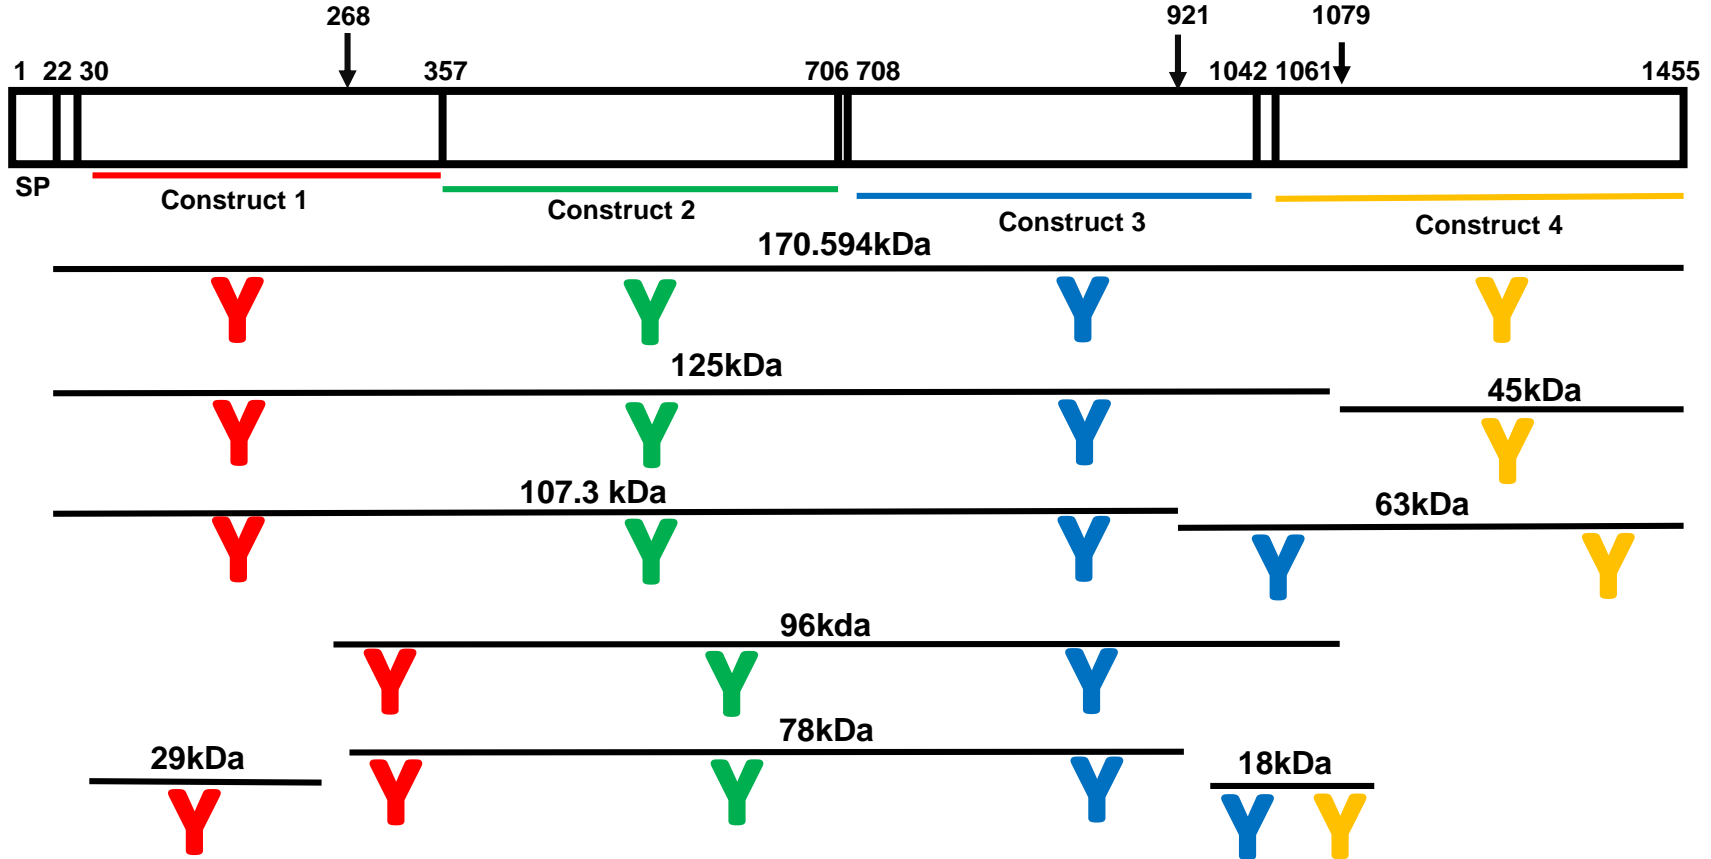

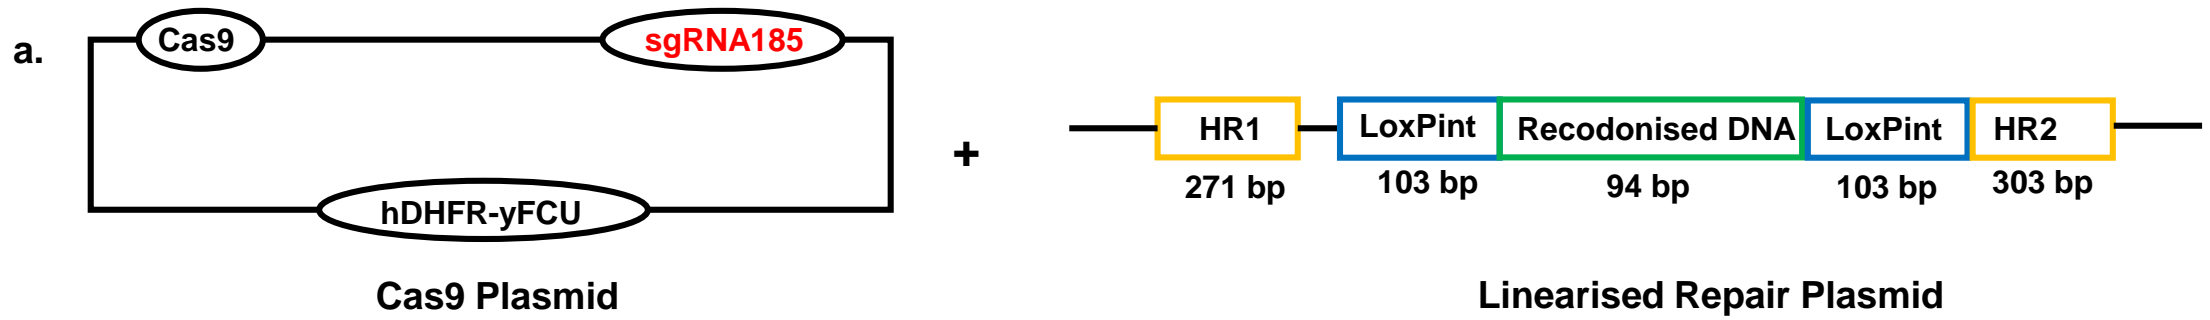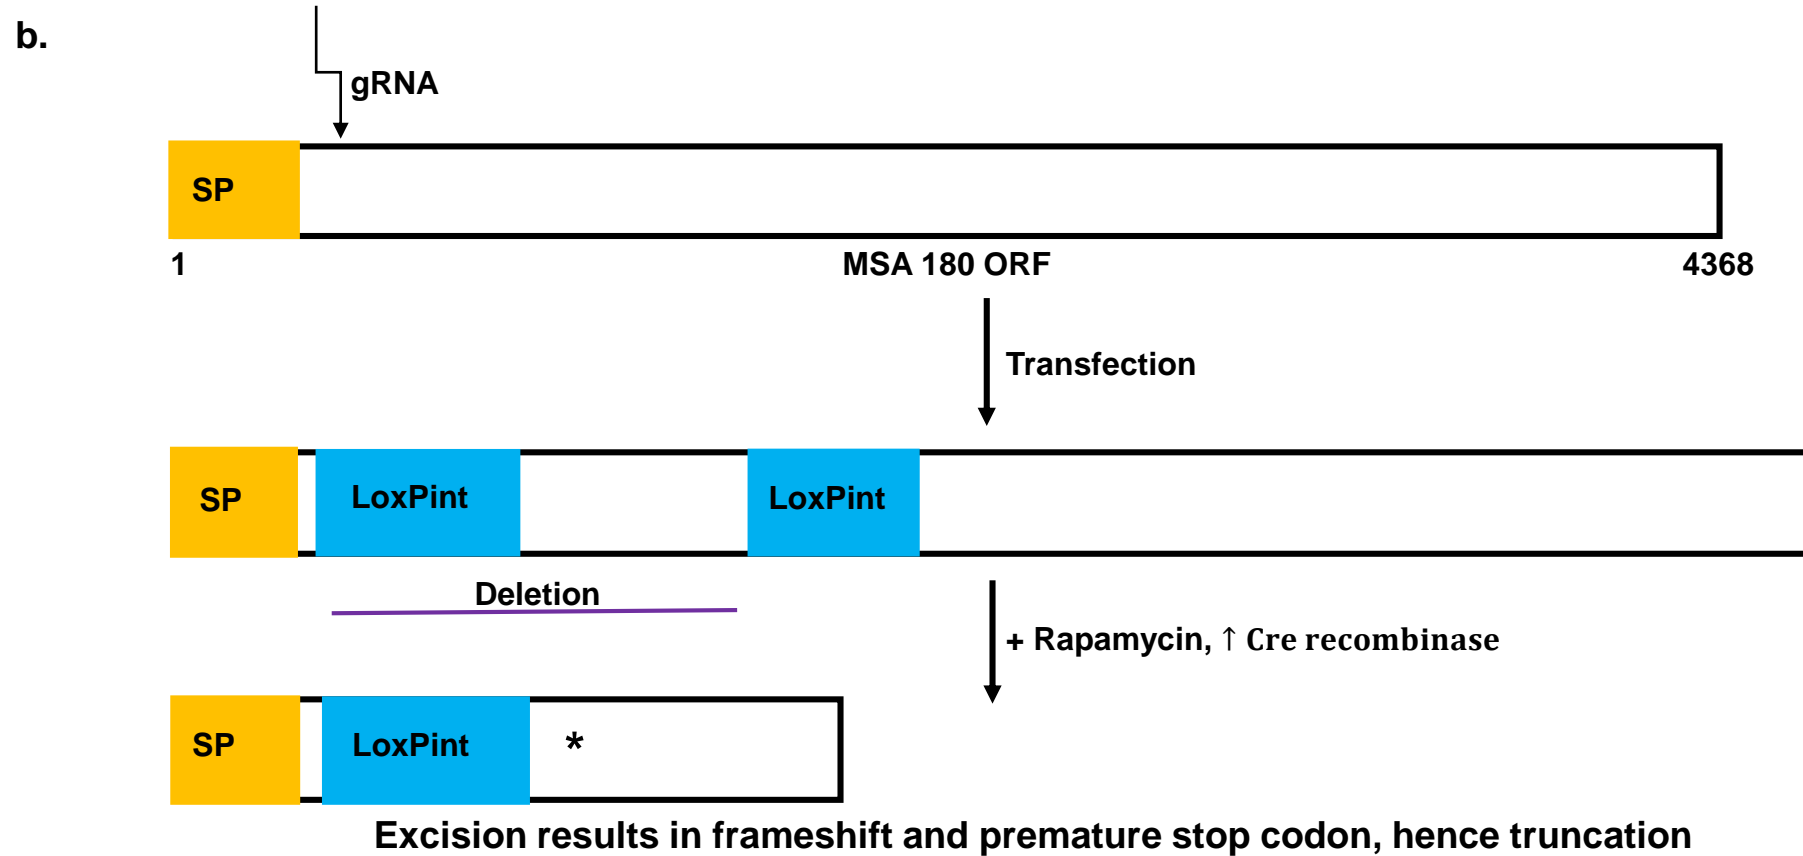

**a. SEQUENCE BEFORE EXCISION**

ATGAATCGAATATTTTATTTTGGTTGTTTACTATTTTGGTTTGGTTATCTCTTGTATCTGGTGAAAATGTTAATAATAAAAACCTGTAATGAGAAAAATAGGAAAGCTATTTTAT  
TAGCTTTATTAATAAATTCATTAGTAGATAATAAGGATTATAACAATAGTGAAGAATTAAGTATGCTCTTGAGCACATACA gtaaataaaaaaataatatacaATAACTTCGTATAG  
CATACATTATACGAAGTTATtatatatgtatatatatatatttatattttatattcttttag GAACAGTGAGCTATACCCTAAAGACTCTAAGAAGTTTCGATAAGTTTATAGACGAGTTCTTCTC  
TTACTACAACATACACGTTAACTTCACAGAC gtaaataaaaaaataatatacaATAACTTCGTATAGCATAACATTATACGAAGTTATtatatatgtatatatatatatttatattttatattcttttag  
GAAGAAAAAGAATATTACATATATCAGGTGTCTTCAAAGAATTTTATGTAGATGTAGATAATTTAAATAAAGATGAAATGAAAGAATATTTTAAGAAAAATTATGAAAAAGG

**b. SEQUENCE AFTER EXCISION**

ATGAATCGAATATTTTATTTTGGTTGTTTACTATTTTGGTTTGGTTATCTCTTGTATCTGGTGAAAATGTTAATAATAAAAACCTGTAATGAGAAAAATAGGAAAGCTATTTTAT  
TAGCTTTATTAATAAATTCATTAGTAGATAATAAGGATTATAACAATAGTGAAGAATTAAGTATGCTCTTGAGCACATACA gtaaataaaaaaataatatacaATAACTTCGTATAGC  
ATACATTATACGAAGTTATtatatatgtatatatatatatttatattttatattcttttag GAAGAAAAAGAATATTACATATATCAGGTGTCTTCAAAGAATTTTATGTAGATGTAGATAATTT  
AAATAAAGATGAAATGAAAGAATATTTTAAGAAAAATTATGAAAAAGG

**c. PREMATURE STOP CODON AFTER EXCISION**

ATG AAT CGA ATA TTT TAT TTT TGT TTG TTT ACT ATT TTG TTT TGG TTA TCT CTT GTA TCT GGT GAA AAT GTT AAT AAT AAA AAC TGT AAT GAG AAA AAT AGG  
AAA GCT ATT TTA TTA GCT TTA TTA AAA AAT TCA TTA GTA GAT AAT AAG GAT TAT AAC AAT AGT GAA GAA TTA AAG TAT GCT CTT GAG CAC ATA CAG AAG  
AAA AAA GAA TAT TAC ATA TAT CAG GTG TCT TCA AAG AAT TTT ATG TAG ATG TAG ATA ATT TAA ATA AAG ATG AAA TGA AAG AAT ATT TTA AGA AAA ATT ATG  
AAA AAG G

 LoxPint sequence (ATAACT-----TTAT: LoxP Sequence)  
 MSA180 Recodonised DNA

**a.**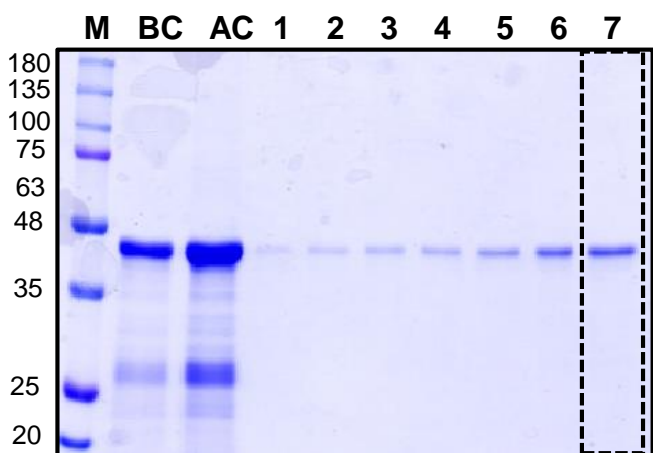**Construct 1**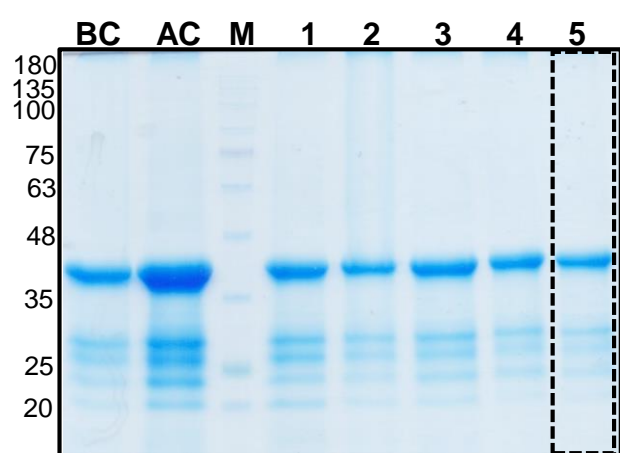**Construct 2**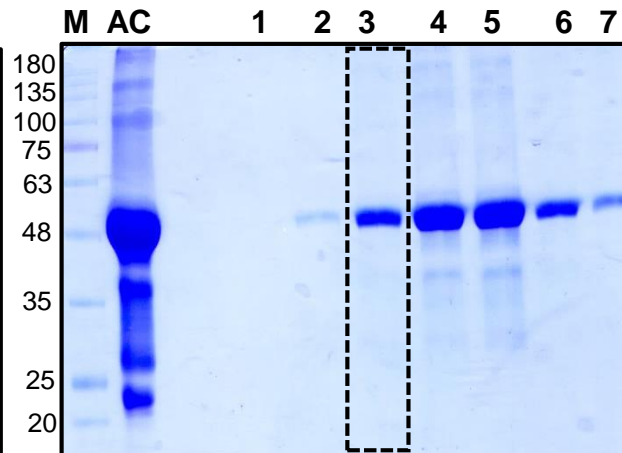**Construct 3**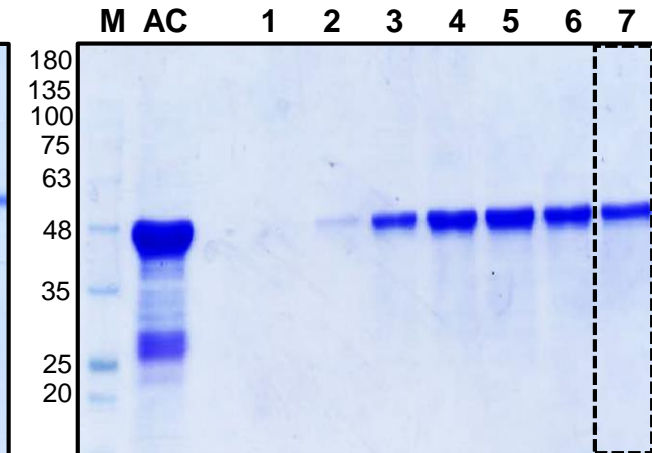**Construct 4****b.**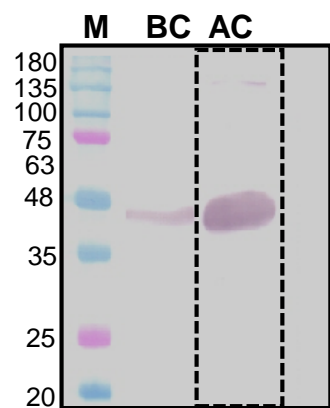**Construct 1**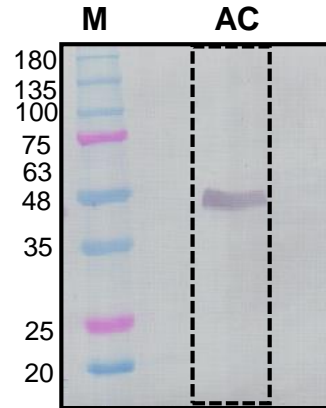**Construct 2**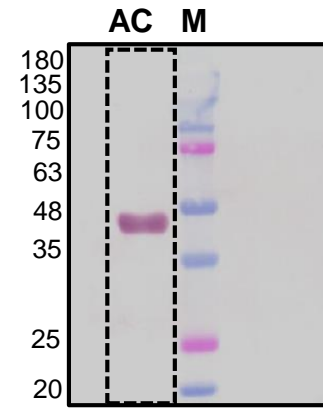**Construct 3**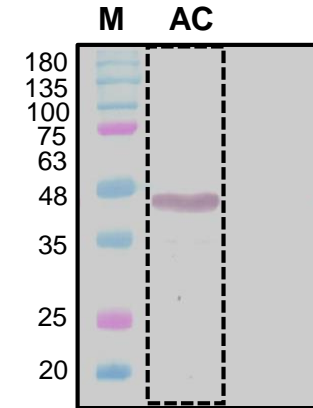**Construct 4**

**a.**

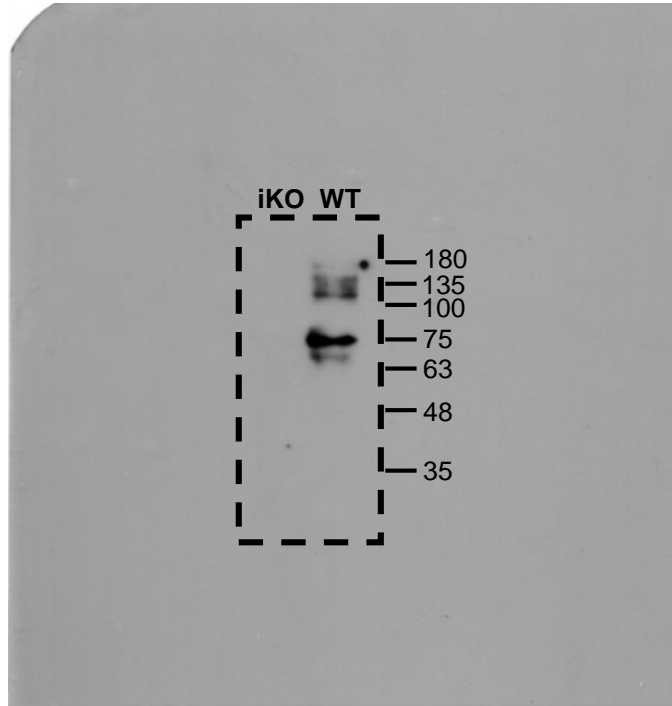

**b.**

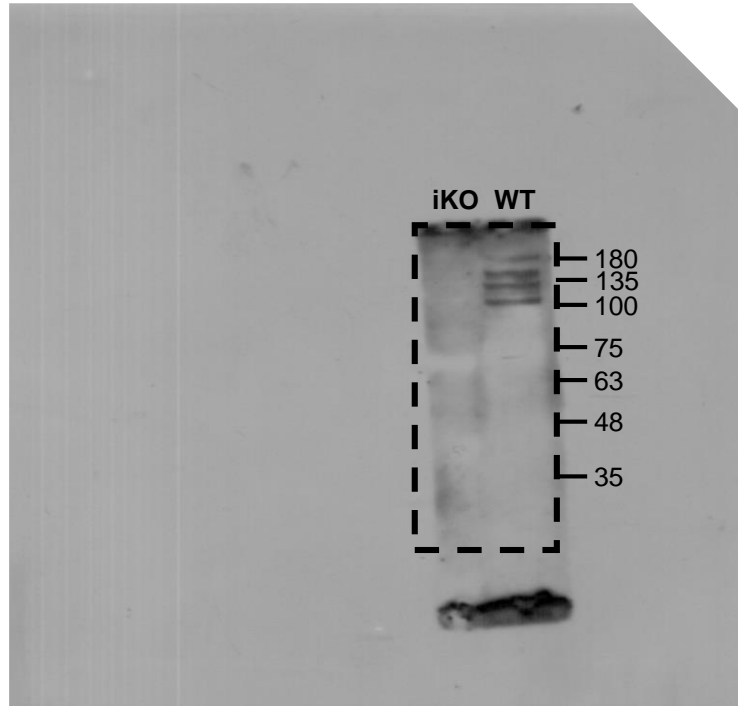

**c.**

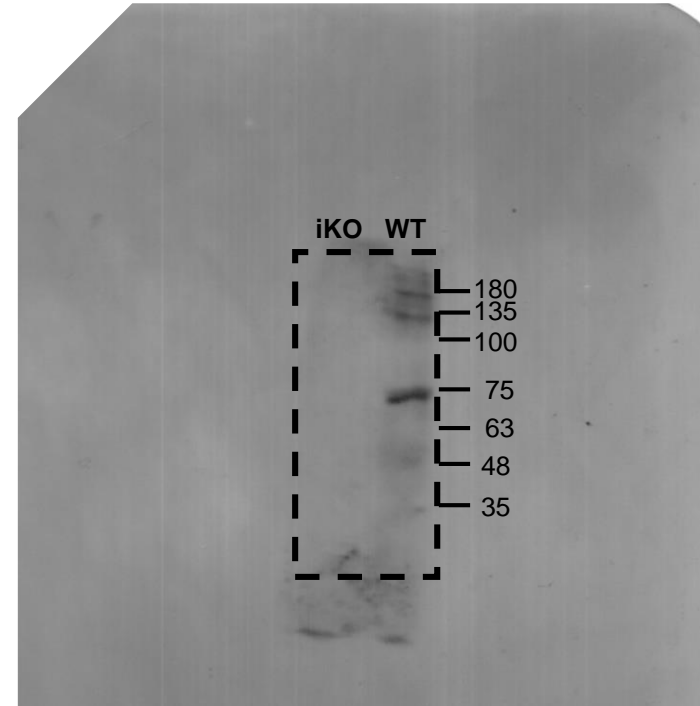

**d.**

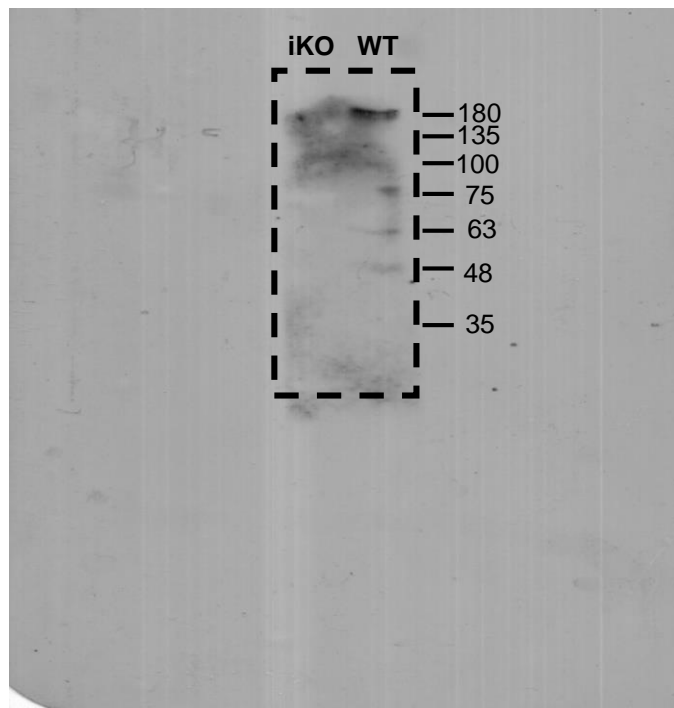

**e.**

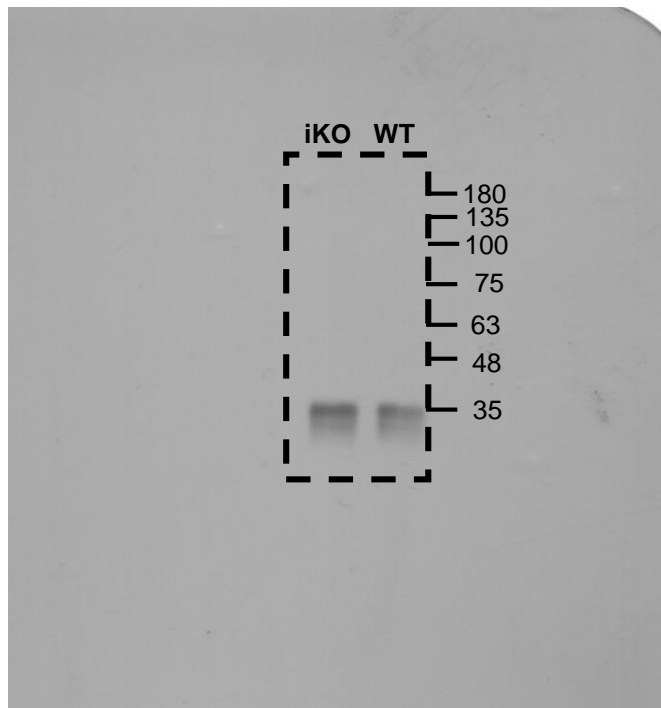

a.

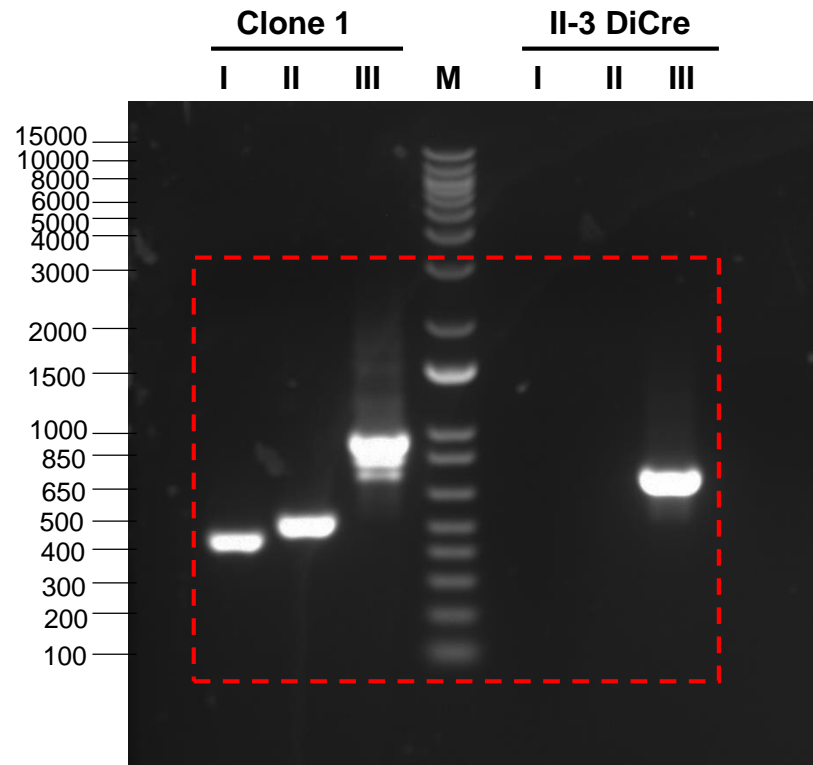

b.

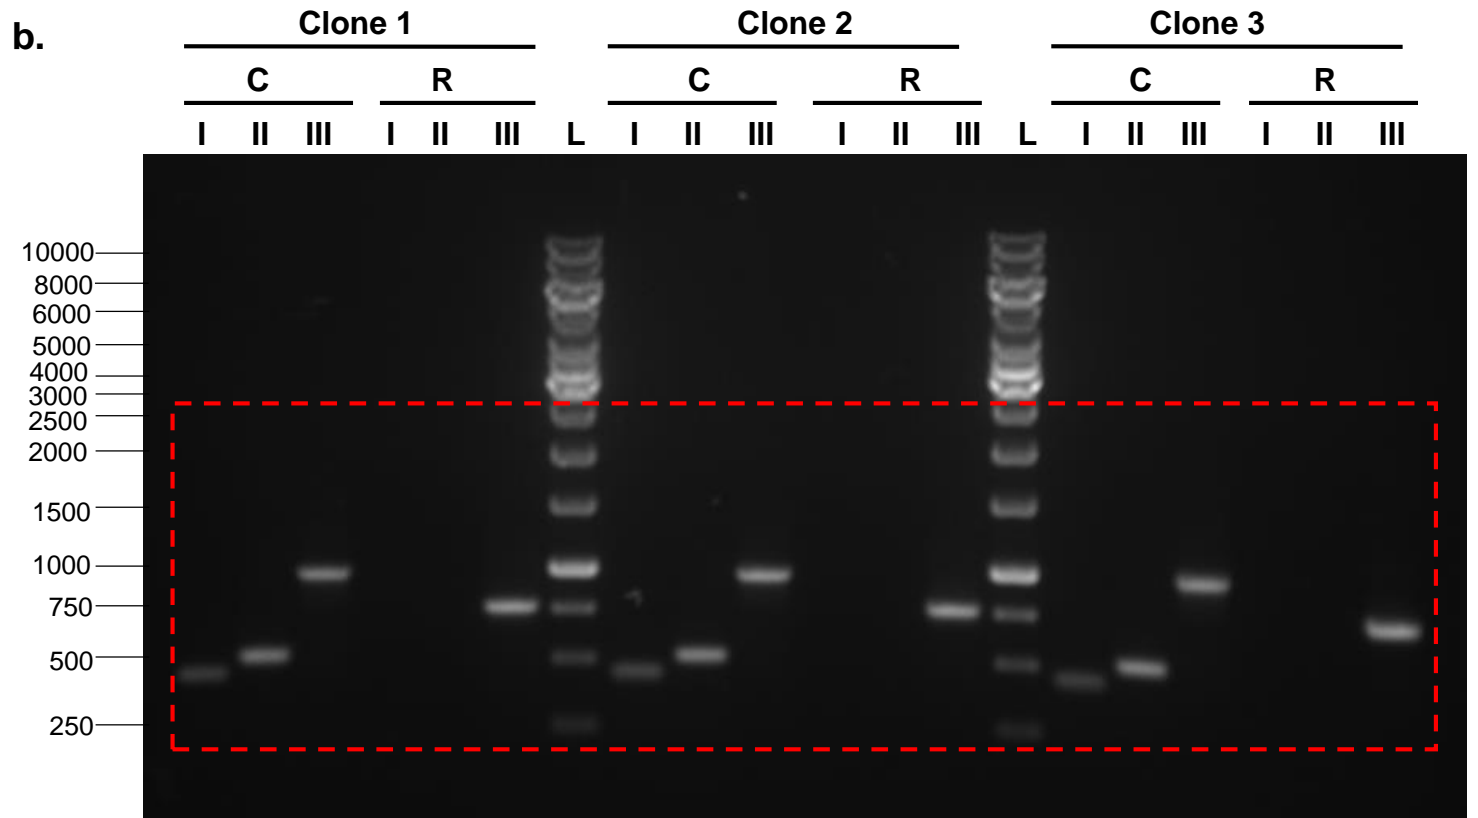

Supplement: 41598_2021_98707_MOESM1_ESM.pdf [file 41598_2021_98707_MOESM1_ESM.pdf]
